# Supplementary material
Source: Research Square preprint supplement (doi:10.21203/rs.3.rs-9436252/v1)
Supplement: Supplementary file 1 [file 3acfdad14dfff2dbd0d54a3c.docx]

**Supplementary Material**

**Article:** FitWisdom: User perceptions of an explainable, fairness-audited exercise recommender in a community setting

**Journal:** User Modeling and User-Adapted Interaction

**Authors:** Parvati Naliyatthaliyazchayil, Lalitha Pranathi Pulavarthy, Kevin Chen, Khushboo Chandnani, Viraj Gadeela, Donya Nemati, Navin Kaushal, Saptarshi Purkayastha

**Corresponding Author:** Saptarshi Purkayastha, Department of Biomedical Informatics and Engineering, Indiana University, Indianapolis, IN, USA ([saptpurk@iu.edu](mailto:saptpurk@iu.edu))

Online Resource 1: Survey Instrument

The following 21-item survey was administered to participants immediately following their interaction with the FitWisdom application. Items 1-3 collected demographic information. Items 4-21 assessed usability perceptions; of these, 13 items (Q5-Q10, Q12, Q14, Q17Q21) were measured on a 5-point Likert scale and mapped to Health-ITUES constructs for inclusion in the PLS-SEM analysis (see Online Resource 2). Items Q4, Q11, Q13, Q15, and Q16 were excluded from the structural model for the reasons noted below.

| **No.** | **Survey Question** | **Response Format** | **Disposition** |
| --- | --- | --- | --- |
| 1 | What is your age? | Open numeric entry | Demographic covariate (Age) |
| 2 | Gender | Categorical: Male / Female / Choose not to answer | Demographic covariate (Gender) |
| 3 | With which racial group(s) do you identify yourself? | Categorical: White / Black or African American / Asian / Other / Choose not to answer | Demographic descriptor |
| 4 | How would you rate your experience with fitness/exercise apps? | Categorical: Not at all / Little experience / Moderate experience / Extensive experience | Descriptive only; excluded from PLS-SEM (ordinal experience measure, not a Likert-scaled usability item) |
| 5 | How was your experience creating the account? | 5-point Likert (1 = Very Difficult to 5 = Very Easy) | 🡺 EASE1 |
| 6 | How was the process of indicating the exercise equipment you have available? | 5-point Likert (1 = Very Difficult to 5 = Very Easy) | 🡺 EASE2 |
| 7 | How did you find the process of navigating between different sections? | 5-point Likert (1 = Very Difficult to 5 = Very Easy) | 🡺 EASE3 |
| 8 | How would you rate the overall visual appeal in helping you stay engaged with your workout? | 5-point Likert (1 = Not at all Helpful to 5 = Extremely Helpful) | 🡺 IMPACT1 |
| 9 | How was the workout interface (e.g., timer, instructions) in helping you complete your workout? | 5-point Likert (1 = Not at all Helpful to 5 = Extremely Helpful) | 🡺 IMPACT2 |
| 10 | How was the workout summary screens (showing time, points, success %)? | 5-point Likert (1 = Not at all Helpful to 5 = Extremely Helpful) | 🡺 IMPACT3 |
| 11 | If you ended a workout early, how was the feedback mechanism asking how you felt? | Open-ended response | Excluded from PLS-SEM (qualitative responses; not all participants triggered this condition) |
| 12 | What was your experience setting up your workout schedule using the calendar? | 5-point Likert (1 = Very Difficult to 5 = Very Easy) | 🡺 EASE4 |
| 13 | Could the app help in maintaining a more consistent workout routine? | 5-point Likert (1 = Very Unlikely to 5 = Very Likely) | Excluded from PLS-SEM due to conceptual overlap with USEFUL2 |
| 14 | How would you rate the motivational impact of the points and achievements system? | 5-point Likert (1 = Not at all Motivating to 5 = Extremely Motivating) | Excluded from PLS-SEM due to limited data on points and achievements systems for users to evaluate |
| 15 | Which feature did you find most motivating? (rank the features) | Ranking (drag-and-drop) | Excluded from PLS-SEM (ordinal ranking data, not interval-scaled) |
| 16 | Did you experience any technical issues while using the app? | Yes/No with optional description | Excluded from PLS-SEM (used for internal debugging and quality assurance only) |
| 17 | When you had difficulties completing a task, what was the recovery process like? | 5-point Likert (1 = Very Difficult to 5 = Very Easy) | 🡺 CONTROL2 |
| 18 | How much control do you feel you have over the app’s functions? | 5-point Likert (1 = Very Little Control to 5 = Complete Control) | 🡺 CONTROL1 |
| 19 | How satisfied are you with the app overall? | 5-point Likert (1 = Very Dissatisfied to 5 = Very Satisfied) | 🡺 USEFUL1 |
| 20 | How likely are you to continue using this app? | 5-point Likert (1 = Very Unlikely to 5 = Very Likely) | 🡺 USEFUL2 |
| 21 | How likely are you to recommend this app to others? | 5-point Likert (1 = Very Unlikely to 5 = Very Likely) | 🡺 USEFUL3 |

Online Resource 2: Mapping Survey Items to Health-ITUES Constructs

The following table maps survey items to their corresponding Health-ITUES construct for inclusion in the PLS-SEM analysis. The labels correspond to those shown in Figure 2 of the main text. Mapping rationale is provided for each item to ensure transparency in construct operationalization.

| **Label** | **Question** | **Construct** | **Mapping Rationale** |
| --- | --- | --- | --- |
| EASE1 | How was your experience creating the account? (Q5) | Perceived Ease of Use | Measures the effort required for a fundamental system interaction (account creation), directly reflecting perceived ease of use. |
| EASE2 | How was the process of indicating the exercise equipment you have available? (Q6) | Perceived Ease of Use | Measures the effort required for a key data entry task during onboarding. Equipment selection is part of user profile construction, and its ease directly reflects system usability. |
| EASE3 | How did you find the process of navigating between different sections? (Q7) | Perceived Ease of Use | Navigation efficiency is a primary dimension of perceived ease of use in usability frameworks [20]. |
| EASE4 | What was your experience setting up your workout schedule using the calendar? (Q12) | Perceived Ease of Use | Measures the effort required for a core scheduling task. Calendar-based schedule setup involves multiple interaction steps, making it a robust indicator of system ease of use. |
| IMPACT1 | How would you rate the overall visual appeal in helping you stay engaged with your workout? (Q8) | Impact | The qualifier “in helping you stay engaged” frames this item as measuring the app’s perceived effect on user behavior (sustained engagement), not visual design per se. In the Health-ITUES framework, Impact captures the perceived effect of the system on the user’s activities or outcomes [20]. |
| IMPACT2 | How was the workout interface (e.g., timer, instructions) in helping you complete your workout? (Q9) | Impact | Asks about the interface’s effect on workout completion — a behavioral outcome. The item measures whether the system’s features translate into meaningful support for the user’s exercise behavior, aligning with the Impact construct. |
| IMPACT3 | How was the workout summary screens (showing time, points, success %)? (Q10) | Impact | Summary screens provide performance feedback that shapes how users perceive the app’s influence on their exercise awareness and behavior. Feedback mechanisms are recognized as drivers of perceived impact in digital health interventions [20]. |
| CONTROL1 | How much control do you feel you have over the app’s functions? (Q18) | User Control | Direct measure of perceived control over the system, the defining characteristic of the User Control construct in Health-ITUES [20]. |
| CONTROL2 | When you had difficulties completing a task, what was the recovery process like? (Q17) | User Control | Error recovery is a recognized dimension of user control in usability frameworks. When the system presents difficulties, the user’s ability to recover and resume their intended task reflects their sense of system mastery and control. This aligns with Nielsen’s “help users recognize, diagnose, and recover from errors” heuristic. |
| USEFUL1 | How satisfied are you with the app overall? (Q19) | Perceived Usefulness | In the Health-ITUES framework, overall satisfaction serves as an indicator of perceived usefulness because it captures the user’s holistic assessment of whether the system meets their needs and expectations. Satisfaction and usefulness are empirically correlated in health IT acceptance research [48, 49]. |
| USEFUL2 | How likely are you to continue using this app? (Q20) | Perceived Usefulness | Behavioral intention to continue use is a well-established proxy for perceived usefulness in technology acceptance models, including TAM and UTAUT, as users who perceive a system as useful express greater intention to continue using it. |
| USEFUL3 | How likely are you to recommend this app to others? (Q21) | Perceived Usefulness | Willingness to recommend reflects the user’s overall assessment of the system’s value to others — a core facet of perceived usefulness. This item captures social endorsement as an outcome of perceived usefulness. |

Online Resource 3: Qualitative Coding of Think-Aloud Sessions

Summary

Think-aloud session transcripts from 26 individual participants (out of 32 enrolled) were coded using iterative open and axial coding procedures. Some participants were observed in grouped sessions (e.g., S2-S4, S5-S6, S13-S14, S15-S17, S18-S20), with individual quotes attributed to the group identifier. A total of 200 coded excerpts were extracted and mapped to Health-ITUES constructs and granular codes. The distribution of coded excerpts across constructs is summarized below.

| **Construct** | **Coded Excerpts** | **Participants Represented** | **Example Codes** |
| --- | --- | --- | --- |
| Perceived Ease of Use | 51 | 25 | Navigation Confusion, Formatting Issue, Data Entry Confusion, Onboarding Clarity, Low Learning Curve, Exploratory Learning |
| User Control | 51 | 26 | Task Flow Explanation, Feature Discoverability, Customization Desire, Privacy Concern, Goal Setting, UI Layout Suggestion |
| Impact | 49 | 26 | Self-Evaluation, Gamification, Progress Metric, Workout Guidance, Competitor Comparison, Streak Feature, Personalization |
| Perceived Usefulness | 49 | 23 | Uncertain Value Proposition, Positive Feedback, Feature Incompleteness, Social Feature, Progress Visualization, Recommendation System |
| **Total** | **200** | **26 unique** |  |

The near-equal distribution of excerpts across all four constructs (49-51 per construct) and high participant coverage (23-26 participants per construct out of 26 total) indicate broad engagement with all usability dimensions. The representation of 26 out of 32 enrolled participants (81.3%) in the qualitative data provides adequate coverage for thematic analysis. Six participants (S11, S12, S23, S24, S25, and one additional participant) did not generate individually attributable coded excerpts, either because they were part of grouped sessions captured under other identifiers or because their sessions yielded limited verbalizable feedback.

Intercoder reliability was established through independent coding of a subset of transcripts by two researchers (KC and CK), with discrepancies resolved through consensus discussion.

Full Coding Table

The table below presents all 200 coded excerpts with their participant identifier, verbatim quote, mapped Health-ITUES construct, and granular codes. Quotes are presented in participant order.

| **Subject ID** | **Quotes** | **Construct** | **Codes** |
| --- | --- | --- | --- |
| S1 | “Oh, so I think the task is you have navigation things down there.” | Ease of Use | Navigation Confusion, Task Interpretation |
| S1 | “It doesn't have that slash in DOB.” | Ease of Use | Formatting Issue, Data Entry Confusion |
| S1 | “So you can select your workout duration and you can try to see how you can start the workout.” | User Control | Task Flow Explanation, Discoverability |
| S1 | “So like you need to start a workout here.” | User Control | Action Confirmation, Task Identification |
| S1 | “Can the app be like integrated into the gym?” | User Control | Feature Expectation, Integration Suggestion |
| S1 | “So you'll ask us to start a workout and, you know, explore the app and see where you can start your workout.” | User Control | Task Understanding, Exploratory Interaction |
| S1 | “I would say I did terrible because I only asked 3000 seconds.” | Impact | Self-Evaluation, Time Confusion |
| S1 | “It says how did I do? … I'm not really … this is not a new valuation.” | Impact | Feedback Confusion, Performance Uncertainty |
| S1 | “I'm no more likely to use it than I don't know if I would use it or not.” | Usefulness | Uncertain Value Proposition, Indecisive Engagement |
| S1 | “I'm not saying it's a bad app, OK? I'm just saying…” | Usefulness | Hesitant Criticism, Mixed Feedback |
| S2-S3-S4 | “I just scrolled around the app and I figured it out" | Ease of Use | Discoverability, Ease of Navigation |
| S2-S3-S4 | “The calendar's a little too small, as in the achievements.” | Ease of Use | Visual Design, UI Element Size Issue |
| S2-S3-S4 | “So stats, I can see that. I can see success rates and total workouts right over here.” | Ease of Use | Information Visibility, Dashboard Clarity |
| S2-S3-S4 | “I click the hamburger over here and I see notifications and settings… I would expect to find all your guide being placed like this on profile.” | User Control | Navigation Expectation, Mental Model Misalignment |
| S2-S3-S4 | “The social feature, I think there should be a dedicated window, dedicated tab for it…” | User Control | Feature Placement, UI Organization |
| S2-S3-S4 | “So do you think we should place it in a different spot or anything extra?” → “Yeah.” | User Control | Feature Placement Suggestion, Design Feedback |
| S2-S3-S4 | “I'm actually a little curious to see how the specs are generated… I usually base it off like a strength level.” | Impact | User Curiosity, Data Interpretation Preference |
| S2-S3-S4 | “This particular workout increase from...” | Impact | Incomplete Feedback, Feature Flow Confusion |
| S2-S3-S4 | “This is very nice.” (Referring to viewing stats like success rates and workouts completed) | Usefulness | Positive Feedback, Data Visualization Appreciation |
| S2-S3-S4 | “I don't know if this feature is necessary.” *(Referring to an unclear section in hamburger menu)* | Usefulness | Feature Clarity Concern, Navigation Confusion |
| S2-S3-S4 | “When I think about health apps or workout apps, I usually base it off like a strength level.” | Usefulness | Mental Model, Evaluation Criteria |
| S5-S6 | “I think it's pretty simple so far.” | Ease of Use | Ease of Use, Initial Impressions, Simplicity |
| S5-S6 | “I think that was pretty, pretty easy.” | Ease of Use | Ease of Navigation, Low Learning Curve |
| S5-S6 | “I just wish when you clicked on it, it like… that was easy to start the workout, but like it gave me my workout along with it.” | Ease of Use | Feature Expectation, Workflow Incompleteness, User Frustration |
| S5-S6 | “Do I have to create an account here?” | User Control | Onboarding, Account Setup Uncertainty, Privacy Concern |
| S5-S6 | “Can I log myself out of here because I use my real information?” | User Control | Security Awareness, Logout Accessibility, User Data Privacy |
| S5-S6 | “I think the achievements… are all time based.” | Impact | Data Limitation, Achievement Relevance, Metric Feedback |
| S5-S6 | “I was expecting the achievements [to show] number of reps or like weight… tailored to my goals more.” | Impact | Personalization Expectation, Goal Alignment, Performance Metrics |
| S5-S6 | “I don’t work out for time. I work out for weight—reps and weights you use.” | Impact | User Goal Misalignment, Tracking Preference, Metric Customization |
| S5-S6 | “Like if I’m bench pressing, I want to see how I’m improving my bench press.” | Impact | Specific Feedback Needs, Progress Visualization, Exercise-Level Tracking |
| S7 | “Like I think the app is really easy to use.” | Ease of Use | Ease of Use, Positive User Sentiment, Low Cognitive Load |
| S7 | “I think it's pretty easy to use.” | Ease of Use | Ease of Use, Initial Impressions, User Satisfaction |
| S7 | “I just have to mess around with it and figure it out.” | Ease of Use | Exploratory Learning, Lack of Guidance, Trial-and-Error Navigation |
| S7 | “So if I was to get on here and I was trying to get to the workout, that's what I'm saying, how would I get to it?” | User Control | Navigation Confusion, Findability Issues, Unclear Workflow |
| S7 | “Can you figure out where your achievements is and where you can invite a friend?” → “Yes, I was just on that.” | User Control | Feature Discoverability, Ease of Navigation, UI Familiarity |
| S7 | “I just have to mess around with it and figure it out.” | User Control | Reinforced Lack of Onboarding, Exploratory Learning |
| S7 | “So now do you think that teaching the workout was easier for you?” → “Like I think the app is really easy to use.” | Impact | Task Completion, Positive Reinforcement, Ease of Learning |
| S7 | “But when you get on here to do your workout with them though, that's what I was trying to figure out.” | Impact | Group Workout Navigation, Action Clarity Issues, Contextual Ambiguity |
| S7 | “So if it's I'd have to get on here and see how it worked out, like I'd have to just log on like it.” | Usefulness | User Trial Mentality, Low Confidence in Initial Use, Uncertainty |
| S7 | “I would say maybe when you get on there… like hey, like when you get on there, like it'll show you…” | Usefulness | Expectation of Guidance, Anticipated UI Prompts, Guided Onboarding |
| S7 | “That's the invite. That's how you get to the invite.” | Usefulness | Feature Confirmation, UI Learnability, Reinforced Understanding |
| S7 | “I thought I could help you create one account.” | Usefulness | Account Creation, User Collaboration, Task Interpretation |
| S8 | “I think the app is really easy to use.” | Ease of Use | Ease of Use, Positive First Impression, User Satisfaction |
| S8 | “I just have to mess around with it and figure it out.” | Ease of Use | Exploratory Learning, Lack of Clear Guidance, Trial-and-Error Navigation |
| S8 | “Can I change out the exercises?” | User Control | Customization Desire, Feature Uncertainty, User Control |
| S8 | “Do I have to select a preference?” | User Control | Onboarding Confusion, Required Input Clarity, Form Interaction Uncertainty |
| S8 | “If you just finished school and you had fun at the gym…” | Impact | Contextual Scenario, User Persona Reflection, Emotional Tone |
| S8 | “Let me just get this out for you.” | Usefulness | Helping Behavior, Collaborative Interaction, User Support |
| S9 | “Maybe instead of success rate, you could just say like consistent, great…” | Ease of Use | Terminology Feedback, Clarity Suggestion, User-Centered Language |
| S9 | “Well, I was just wondering… if I go on tomorrow, is it going to be part of the same program or make a new one?” | Ease of Use | Continuity Concern, Progress Tracking Uncertainty, User Expectation |
| S9 | “So am I doing my own back workout… or does it give me options?” | User Control | Guidance vs. Freedom, Customization Desire, Program Clarity |
| S9 | “If it has like the weight that you're using and every week it adds weight for you.” | User Control | Progressive Overload Expectation, Automated Tracking, User Goal Alignment |
| S9 | “I don’t really time my workouts, but it would be helpful to know if I spend more or less time.” | Impact | Passive Tracking Value, Time Awareness, Usage Insight |
| S9 | “It just tracks your exercises… and then it adds like 5 lbs every week…” | Impact | Automated Progression, Motivation Feature, Exercise Tracking |
| S9 | “Maybe that… if it has the weight you're using and every week it adds weight for you.” | Impact | Reinforcement of Progressive Overload, Weight-Based Tracking Preference |
| S9 | “Do you get something if you... the more points you earn?” | Usefulness | Gamification Curiosity, Reward System Expectation, User Motivation |
| S9 | “No, I wouldn't expect anything. But I think it could work if you get like little notifications or something.” | Usefulness | Notification Suggestion, Extrinsic Motivation, Feature Feedback |
| S9 | “Maybe like little badges or something, the more points you get.” | Usefulness | Gamification, Achievement System, Incentive Feature Suggestion |
| S9 | “It’s nice to see how many workouts you've done.” | Usefulness | Progress Visualization, Motivational Feedback, User Satisfaction |
| S10 | “Yeah, you can put random data in.” | Ease of Use | Data entry flexibility, Test data usage |
| S10 | “Easy enough.” | Ease of Use | Ease of use, Positive usability feedback |
| S10 | “It’s a good list of available demographics at least.” | Ease of Use | Content completeness, Demographic options satisfaction |
| S10 | “OK, that’s a unique link.” | Ease of Use | Feature recognition, Link uniqueness |
| S10 | “It doesn’t need to be a true data, it just needs to be like@gmail.com.” | User Control | Placeholder data usage, Validation leniency |
| S10 | “Do activities push from the set one?” | User Control | Feature clarity, System behavior uncertainty |
| S10 | “Anybody who wants to back their workout should have this thing in the app.” | User Control | Feature necessity, Workout tracking importance |
| S10 | “We share it from your profile.” | User Control | Sharing functionality, Profile based access |
| S10 | “Standard apps have a rest… when it pauses, it automatically turns.” | Impact | Comparison to other apps, Auto pause feature expectation |
| S10 | “As soon as I’m not doing anything, it automatically starts… allowing me what I did last time.” | Impact | Automation, Workout history recall |
| S10 | “If you complete a 15-minute workout… it could be 5 minutes, 2 minutes each time.” | Impact | Workout flexibility, Session segmentation |
| S10 | “Once complete… should be reduced once complete.” *(on progress tracking)* | Impact | Progress tracking update, Completion feedback |
| S10 | “That’s some good feedback really.” | Usefulness | Positive feedback acknowledgment, User validation |
| S10 | “Progress part OK… more like a dashboard.” | Usefulness | Dashboard preference, Progress visualization |
| S10 | “Too much information.” *(on profile page)* | Usefulness | Information overload, UI simplification need |
| S10 | “Profile meets myself… everything under one is nice, but may or may not.” | Usefulness | Profile centralization, Mixed opinion on integration |
| S10 | “Invite friends… that’s a unique link.” | Usefulness | Social feature, Link uniqueness |
| S21 | “OK, so I want you to get started with the app and fill in your details.” | Ease of Use | Task Instruction, Onboarding Clarity, Initial Setup |
| S21 | “You can put your fake name, fake e-mail ID, That’s fine.” | Ease of Use | Data Entry, Privacy Option, Flexibility |
| S21 | “Yeah.” / “OK, got it.” (multiple instances) | Ease of Use | Task Confirmation, Understanding, User Acknowledgement |
| S21 | “It should be an accordion on achievements…” | Ease of Use | UI Design Suggestion, Feature Layout, Information Organization |
| S21 | “Maybe my stats for the week… give me my total workouts.” | User Control | Progress Tracking, Personal Metrics, Weekly Summary |
| S21 | “It’s time to change.” | User Control | Motivational Prompt, Behavior Change, User Engagement |
| S21 | “Maybe you can say invite a friend to work out with you…” | User Control | Social Feature, Engagement Suggestion, Community Building |
| S21 | “Between stats and account.” | User Control | Navigation, Interface Layout, Menu Placement |
| S21 | “You constantly work out five days this week or… you increase the amount of time…” | Impact | Goal Setting, Workout Tracking, Behavior Reinforcement |
| S21 | “Prompt you… It’s time to change.” | Impact | Automated Reminders, Motivation, Habit Support |
| S21 | “Invite a friend to work out with you…” | Impact | Social Interaction, Invitation Feature, Peer Motivation |
| S21 | “Profile page… you can see some stats.” | Usefulness | Profile View, Progress Display, Data Visibility |
| S21 | “Apple has their own thing for sharing.” | Usefulness | Competitor Reference, Feature Comparison, Market Awareness |
| S21 | “That’s a good idea.” / “I love it.” | Usefulness | Positive Feedback, Feature Approval, Engagement |
| S21 | “We would want to analyse how most people are doing it.” | Usefulness | Comparative Analysis, Social Benchmarking, Insight Gathering |
| S22 | “I mean, these graphics are attractive.” | Ease of Use | Visual Appeal, UI Aesthetics, Design Feedback |
| S22 | “I usually log in with an e-mail address.” / “I'd rather not put things in Google.” | Ease of Use | Login Preference, Privacy Concern, Authentication |
| S22 | “My password more than 8 characters.” | Ease of Use | Security, Password Policy, Account Setup |
| S22 | “I'd say some more easy.” (on onboarding) | Ease of Use | Onboarding Difficulty, Usability, Improvement Suggestion |
| S22 | “Somewhat easy.” (on selecting equipment) | Ease of Use | Task Ease, Usability, Equipment Setup |
| S22 | “Oh, that was very easy.” (on navigation) | Ease of Use | Navigation Ease, Positive Experience, Intuitiveness |
| S22 | “Somewhat intuitive.” (on workout interface) | Ease of Use | Interface Usability, Learnability, Navigation Flow |
| S22 | “Somewhat difficult.” (on workout schedule setup) | User Control | Scheduling Difficulty, Task Complexity, Setup Challenge |
| S22 | “Somewhat easy… you could just navigate around.” (on task recovery) | User Control | Recovery Task Ease, Navigation, User Control |
| S22 | “Good control.” (on app functions) | User Control | Functionality, User Control, Satisfaction |
| S22 | “Maybe slightly.” (on helping maintain routine) | Impact | Routine Support, Low Impact, Habit Formation |
| S22 | “Moderately.” / “Not something that motivates me personally.” (on points/achievements) | Impact | Motivation, Gamification, Personal Relevance |
| S22 | “Workout streaks… and progress tracking… would be the best.” | Impact | Feature Suggestion, Progress Tracking, Gamification |
| S22 | “Moderately helpful.” (on workout summary) | Usefulness | Summary Usefulness, Feedback, Information Value |
| S22 | “Slightly useful.” (on feedback mechanism) | Usefulness | Feedback Mechanism, Limited Usefulness, User Perception |
| S22 | “Somewhat satisfied.” (overall satisfaction) | Usefulness | Overall Satisfaction, Positive Experience, General Feedback |
| S22 | “Somewhat likely… especially if it would connect to my health insurance.” | Usefulness | Likelihood to Recommend, Health Integration, Conditional Use |
| S22 | “Somewhat likely.” (on recommending the app) | Usefulness | Likelihood to Recommend, User Opinion, Word of Mouth |
| S13-S14 | “I think it's pretty simple so far.” | Ease of Use | Ease of Use, Positive First Impression, Intuitive Interface |
| S13-S14 | “I think that was pretty, pretty easy.” | Ease of Use | Simplicity, Task Completion Satisfaction, User Confidence |
| S13-S14 | “You check what you want to accomplish.” | User Control | Goal Selection, Personalization, User Autonomy |
| S13-S14 | “Do you have any kind of fitness level?” | User Control | Onboarding Relevance, Personalization Expectation, User Profiling |
| S13-S14 | “Start my workout.” | User Control | Primary Action, Clarity of Call-to-Action, Task Initiation |
| S13-S14 | “I just completed the workout in the app.” | User Control | Task Completion, User Progress, Engagement |
| S13-S14 | “I think the app is good.” | Impact | Overall Positive Feedback, General Satisfaction, User Approval |
| S13-S14 | “But I need more like pictures or something.” | Impact | Visual Content Feedback, Design Expectation, Instructional Support |
| S13-S14 | “Like when you start a workout, a picture which shows which workout that is.” | Impact | Visual Guidance, Preview Expectation, Content Clarity |
| S13-S14 | “I don’t really use my apps to track anything. I just kind of go to the gym, work out and go home.” | Impact | Low Tracking Motivation, Habitual Behavior, Feature Misalignment |
| S13-S14 | “I like the design.” | Usefulness | Aesthetic Appreciation, UI Satisfaction, Visual Appeal |
| S13-S14 | “If you are able to reach there, that means it's usable for you.” | Usefulness | Usability Insight, User Accessibility, Outcome-Based Evaluation |
| S15-S16-S17 | “Where do I go for that?” | Ease of Use | Navigation Confusion, Information Seeking, Findability Issue |
| S15-S16-S17 | “OK, go back workout.” | Ease of Use | User Path Correction, Task Orientation, Navigation Behavior |
| S15-S16-S17 | “It should be like one home screen… in the middle or something.” | Ease of Use | Layout Expectation, Homepage Design Feedback, Centralized Access |
| S15-S16-S17 | “Maybe I don’t want to share my points with this guy.” | User Control | Privacy Concern, Data Sharing Hesitation, Social Boundaries |
| S15-S16-S17 | “I should have a… like I might want to share it with a couple people.” | User Control | Selective Sharing, Customization, Privacy Settings Expectation |
| S15-S16-S17 | “We can be friends, but I don’t want to share my stats with you.” | User Control | Social Connection Boundaries, Granular Privacy Control, User Autonomy |
| S15-S16-S17 | “There’s an instructor who does the workouts.” | Impact | Guided Experience, Instructor Presence, Content Type Identification |
| S15-S16-S17 | “I like the points thing… gives you something to work towards.” | Usefulness | Gamification Appreciation, Motivational Feature, Goal Reinforcement |
| S15-S16-S17 | “Do you think when you invite your friend, you should be able to see their points if they so choose?” | Usefulness | Consent-Based Sharing, User Control, Feature Suggestion |
| S18-S19-S20 | “If the intent is for the user to come into the app that I have a scheduled workout, if it appears towards the top... that would be my preference personally.” | Ease of Use | Homepage Prioritization, Scheduled Workout Visibility, User Preference |
| S18-S19-S20 | “Instead of having to go through a couple different pages, then get to the schedule to then start my workout.” | Ease of Use | Navigation Frustration, Task Efficiency, Minimize Steps |
| S18-S19-S20 | “Make it easy, easy to track, easy to stop.” | Ease of Use | Simplicity, Tracking Needs, Usability Expectation |
| S18-S19-S20 | “So whatever comes to the right technique so that I can take some.” | User Control | Guidance Need, Technique Support, Instruction Clarity |
| S18-S19-S20 | “Can I click on any of these pages right now?” | User Control | Interactivity Expectation, Affordance Clarity, User Confusion |
| S18-S19-S20 | “Afterwards I can see, oh, I completed it, checked the achievements, things like that.” | Impact | Progress Visibility, Post-Workout Feedback, Achievement Tracking |
| S18-S19-S20 | “The stuff I did like about Garmin... I just like to see a lot, a ton of data behind my workouts.” | Impact | Data Richness, Comparative Feedback, User Preference for Metrics |
| S18-S19-S20 | “They want to see their VO2 Max, they want to see their heart rate variability… stuff that like if we're trying to just support people working out and being more consistent, they don't care about that stuff yet.” | Impact | Advanced Metrics Awareness, Different User Needs, Segmented User Preferences |
| S18-S19-S20 | “I think there's definitely opportunity within the space to create an easier [barrier] of entry to people that want to just start working out and be consistent.” | Usefulness | Ease of Entry, Beginner Accessibility, Onboarding Opportunity |
| S18-S19-S20 | “That collaboration partnership thing that we kind of talked about might be helpful too… creating a sense of community.” | Usefulness | Social Features, Community Building, User Motivation |
| S18-S19-S20 | “The main reason I use Apple actually is because I can get my... blood sugar numbers on my watch.” | Usefulness | Health Data Integration, Wearable Preference, Device Ecosystem |
| S26 | “I can do the scrolling for you, right?” | User Control | Navigation, Assistance Offer, Interaction Control |
| S26 | “Instead of choosing the exercises, I'd rather… and then you would have exercise in there.” | User Control | Preference Expression, Exercise Selection, Customization |
| S26 | “So we don't want to do that again.” *(in reference to tracking past exercises)* | Impact | Past Experience, Avoidance, Feature Feedback |
| S26 | “Like how many days I did… because then I can say—somebody, we forget what we did.” | Impact | Progress Tracking, Memory Aid, Usage History |
| S26 | “What's the most motivation for you, like achievements or feedback?” | Impact | Motivation Source, Personalization, Gamification |
| S26 | “If I can see what I did, my workout history... break too.” | Usefulness | Progress Tracking, Workout History, Self-Monitoring |
| S26 | “It's really helpful for us to get the feedback things so that we can work on that.” | Usefulness | Feedback Use, Iterative Improvement, User Input |
| S27 | “I think that’d be somewhat difficult.” | Ease of Use | Perceived Difficulty, Effort Estimation, Usability Challenge |
| S27 | “It seemed easier to get lost.” | Ease of Use | Navigation Difficulty, Wayfinding, Usability Issue |
| S27 | “Like the physical recovery like you were using the app to find where you want it.” | User Control | Recovery Tracking, Goal-Oriented Use, Feature Interpretation |
| S27 | “Yeah, if you got into it, I think yeah, of course.” | Impact | Conditional Engagement, Willingness to Use, Positive Attitude |
| S27 | “Moderately motivated.” | Impact | Motivation Level, Self-Assessment, Engagement |
| S27 | “Then maybe the treatment badges kind of thing, the feedback after workout.” | Usefulness | Gamification, Feedback, Post-Workout Experience |
| S27 | “You know, it’s probably not… it’s not ready for prime time.” | Usefulness | Readiness Assessment, Product Maturity, Improvement Need |
| S27 | “People were, you know, completely functional and I probably would be somewhat, somewhat likely to.” | Usefulness | Perceived Functionality, Likelihood to Use, Engagement Assessment |
| S28 | “Yeah, yeah, I think that’d be helpful.” *(on adding a next button)* | Ease of Use | UI Enhancement Suggestion, Navigation Improvement, Action Prompt |
| S28 | “Just UI stuff that could be cleaned up.” | Ease of Use | UI Cleanliness, Visual Design, Technical Debt |
| S28 | “Do I have to create an account here?” *(from earlier set)* | User Control | Account Creation Requirement, Onboarding Barrier, Setup Process |
| S28 | “Maybe a next button there.” | User Control | UI Enhancement Suggestion, Navigation Improvement, Action Prompt |
| S28 | “What is this question here for?” *(referring to exercise equipment prompt)* | User Control | Question Relevance, Prompt Clarity, User Confusion |
| S28 | “I like the success rate. Is that like the number of workouts that you've 100% completed?” | Impact | Gamification, Progress Metric, Goal Tracking |
| S28 | “That’s a statistic I’ve never seen before on other workout apps… insightful.” | Impact | Unique Feature, Competitive Differentiation, Insightfulness |
| S28 | “If that invite friends turned into like what your friends have been doing recently… that’s cool.” | Impact | Social Feature Suggestion, Friend Activity, Engagement |
| S28 | “Maybe images of the workout you’re doing… showing a figurine or reference.” | Impact | Visual Aid Suggestion, Instructional Support, Workout Guidance |
| S29 | “OK, since this isn't the development phase, we'd like to just sign up an e-mail for now.” | Ease of Use | Signup Process, Development Phase Context, Temporary Measure |
| S29 | “Feel free to… not put your real information.” | Ease of Use | Privacy Option, Data Entry, User Choice |
| S29 | “The only thing that was a little confusing was like how do you start to work out?” | Ease of Use | Task Understanding, Onboarding Clarity, Initial Confusion |
| S29 | “Once you explained it, it made sense.” | Ease of Use | Instruction Effectiveness, Understanding, Task Clarity |
| S29 | “I like everything.” (on profile page) | Ease of Use | Positive Feedback, Profile Page, Overall Satisfaction |
| S29 | “Are these things that I would have done?” / “If you do do them, they'll turn into check mark.” | User Control | Feature Functionality, Gamification, Achievement Tracking |
| S29 | “Even if you press in tight, it doesn’t do anything.” (on social feature) | User Control | Feature Issue, UI Feedback, Social Feature |
| S29 | “I mean, yeah, if I went through it and was like, this is worth it.” | User Control | Perceived Value, User Engagement, Motivation |
| S29 | “This type of stuff is great, especially for beginners.” | Impact | Target Audience, Beginner Friendly, Positive Feedback |
| S29 | “Usually there’s like a button that says starting out.” | Impact | UI Expectation, Onboarding Flow, Call to Action |
| S29 | “I think it’s great.” (on achievements) | Usefulness | Positive Feedback, Achievements, Motivation |
| S29 | “Having that feature for free apps is really good because more people are likely to join.” | Usefulness | Free Feature Value, User Acquisition, Accessibility |
| S29 | “It’s not really fleshed out.” (on social feature) | Usefulness | Feature Incompleteness, Social Feature, Improvement Suggestion |
| S30 | “Like you're opening the app, would you be interested to… do the onboarding process?” | Ease of Use | Onboarding Flow, User Prompt, Task Introduction |
| S30 | “Would you be interested to navigate the features and… continue using this?” | Ease of Use | Feature Exploration, User Engagement, Retention Strategy |
| S30 | “You can set your number of steps like 10,000 or whatever… or even with your calories.” | User Control | Goal Setting, Customization, Activity Tracking |
| S30 | “Where do you get the data… for new people?” | User Control | Data Source, New User Experience, Information Transparency |
| S30 | “The only reason why I workout is because I want to clear the streak.” | Impact | Motivation, Gamification, Streak Feature |
| S30 | “Like the recommended system we have in there… recommend based on the routine.” | Impact | Personalization, Recommendation System, Routine-Based Suggestions |
| S30 | “If we are targeting chronicliness people… we can use that for the routine.” | Impact | Target Audience, Personalization, Health Focus |
| S30 | “Would this app help them?” | Usefulness | Usefulness, Target Audience, Impact |
| S30 | “Having a workout streak… even the health app… have that.” | Usefulness | Streak Feature, Competitor Reference, Motivation |
| S30 | “Recommended system… helping for us.” | Usefulness | Recommendation System, Perceived Helpfulness, Personalization |
| S31 | “OK, yeah… or not to expect the whole page.” | Ease of Use | UI Expectation, Layout, Navigation Flow |
| S31 | “Oh, you can’t, you can’t click it.” | Ease of Use | UI Limitation, Interaction Issue, Feature Accessibility |
| S31 | “Would you recommend like… maybe it should be a different layout.” | User Control | UI Layout, Improvement Suggestion, User Preference |
| S31 | “Light or dark… that’s probably a standard by now.” | User Control | Theme Option, UI Customization, Modern Design Standard |
| S31 | “You guys link to certain gyms… maybe like a GPS thing.” | User Control | Feature Suggestion, Gym Integration, Location Services |
| S31 | “What kind of program is this… are you doing high intensity?” | Impact | Program Clarity, Workout Type, User Inquiry |
| S31 | “Link to certain gyms… connect to certain gyms.” | Impact | Gym Integration, Location Services, Feature Suggestion |
| S31 | “It looks very similar to what I would find on [competitor].” | Usefulness | Competitor Reference, UI Similarity, Market Comparison |
| S31 | “Progress here, like that points thing.” | Usefulness | Progress Tracking, Points System, Gamification |
| S31 | “Maybe like a GPS thing… like that’d be our work.” | Usefulness | Location Services, GPS Feature, Contextual Use |
